# Supplementary material for: Comparative Genomics of Closely-Related Gordonia Cluster DR Bacteriophages
Source: MDPI journal article supplement (doi:10.3390/v14081647), 2022-07-27
Supplement: s1 [file s1]

**Supplementary Table S1.** *Gordonia* cluster DR bacteriophages included in the comparative analyses. For detailed information on each bacteriophage, please visit the Howard Hughes Medical Institute (HHMI) – Science Education Alliance (SEA) Phage Hunters Advancing Genomics and Evolutionary Science (PHAGES) website at <http://phagesdb.org>.

| Phage Name   | Isolation host                           | Length (bp) | GC-content | # ORFs | # tRNAs | Accession # | Reference                     |
|--------------|------------------------------------------|-------------|------------|--------|---------|-------------|-------------------------------|
| AnarQue      | <i>G. rubripertincta</i><br>NRRL B-16540 | 61,822      | 68.8       | 86     | 0       | OK216879    | Curran <i>et al.</i> 2022     |
| AnClar       | <i>G. terrae</i> 3612                    | 61,856      | 69.8       | 81     | 1       | MN908693    | unpublished                   |
| BiggityBass  | <i>G. terrae</i> CAG3                    | 63,202      | 69.4       | 83     | 0       | ON260813    | Versoza, Howell <i>et al.</i> |
| CloverMinnie | <i>G. terrae</i> 3612                    | 61,098      | 68.7       | 84     | 0       | MN234196    | unpublished                   |
| Ligma        | <i>G. terrae</i><br>NRRL B-16283         | 61,714      | 70.2       | 87     | 0       | OM105886    | unpublished                   |
| Mariokart    | <i>G. terrae</i><br>NRRL B-16283         | 60,762      | 70.5       | 83     | 0       | MT657335.1  | unpublished                   |
| NHagos       | <i>G. rubripertincta</i><br>NRRL B-16540 | 59,580      | 68.2       | 82     | 0       | MN369758.1  | Harrington <i>et al.</i> 2020 |
| Sour         | <i>G. terrae</i><br>NRRL B-16283         | 61,670      | 68.0       | 79     | 1       | NC_042132.1 | unpublished                   |
| Yago84       | <i>G. terrae</i> 3612                    | 61,890      | 70.0       | 83     | 0       | MK801725.1  | Pope <i>et al.</i> 2020       |

**Supplementary Table S2.** Bacteriophages included as outgroups in the comparative analyses. Abt2graduatex2 contains a *hicA*-like toxin (pham 34446) whereas Fizzles and Suffolk contain a RuvC-like resolvase (pham 34304). For detailed information on each bacteriophage, please visit the Howard Hughes Medical Institute (HHMI) – Science Education Alliance (SEA) Phage Hunters Advancing Genomics and Evolutionary Science (PHAGES) website at <http://phagesdb.org>.

| Phage Name     | Isolation host                             | Length (bp) | GC-content | # ORFs | # tRNAs | Accession # | Reference               |
|----------------|--------------------------------------------|-------------|------------|--------|---------|-------------|-------------------------|
| Abt2graduatex2 | <i>S. griseus</i><br>ATCC 10137            | 57,385      | 69.2       | 71     | 0       | MF975638.1  | Erill & Caruso 2018     |
| Fizzles        | <i>M. foliorum</i><br>NRRL B-24224         | 62,078      | 68.2       | 104    | 0       | MW924638.1  | unpublished             |
| Suffolk        | <i>M. smegmatis</i><br>mc <sup>2</sup> 155 | 68,262      | 66.6       | 97     | 0       | KF713485.1  | Pope <i>et al.</i> 2015 |

**Supplementary Table S3.** Host bacteria included in the comparative analyses.

| Host                       | # Genes | Length (kb) | GC-content | Accession #     | Reference                         |
|----------------------------|---------|-------------|------------|-----------------|-----------------------------------|
| <i>E. coli</i>             | 4,091   | 4,509       | 50.6       | CP028765        | Kang <i>et al.</i> 2021           |
| <i>G. hydrophobica</i>     | 3,962   | 4,579       | 67.5       | JAFBGB010000001 | unpublished                       |
| <i>G. malaque</i>          | 4,349   | 4,714       | 66.2       | FNRZ010000008   | unpublished                       |
| <i>G. rubripertincta</i>   | 4,740   | 5,104       | 67.5       | CP059694        | Han <i>et al.</i> 2020            |
| <i>G. terrae</i>           | 4,979   | 5,709       | 67.8       | CP029604        | unpublished                       |
| <i>N. asteroides</i>       | 6,341   | 6,987       | 71.8       | CP089214        | Sichtig <i>et al.</i> 2019        |
| <i>N. brasiliensis</i>     | 7,949   | 8,936       | 68.2       | CP022088        | Sichtig <i>et al.</i> 2019        |
| <i>N. nova</i>             | 7,450   | 8,349       | 67.8       | CP006850        | Luo <i>et al.</i> 2014            |
| <i>N. otitidiscaviarum</i> | 6,735   | 7,688       | 69.1       | CP041695        | unpublished                       |
| <i>R. erythropolis</i>     | 6,025   | 6,509       | 62.5       | CP032403        | unpublished                       |
| <i>R. globerulus</i>       | 6,013   | 6,740       | 61.7       | CP079698        | Lozano-Andrade <i>et al.</i> 2021 |

## REFERENCES

- Curran, E., S. E. Callaway, R. R. Dumanlang, A. V. Harshaw, P. N. Palacio, et al. 2022. Genome sequences of *Gordonia rubripertincta* bacteriophages AnarQue and Figliar. *Microbiol. Resour. Announc.* 11(1): e01085-21.
- Erill, I., S. M. Caruso. 2018. Complete genome sequence of *Streptomyces* bacteriophage abt2graduateex2. *Genome Announc.* 6(3): e01480-17.
- Han, S. S., H. K. Kang, B. Y. Jo, B. G. Ryu, H. M. Jin, et al. 2020. Complete genome sequence of *Gordonia rubripertincta* SD5, a soil bacterium isolated from a Di-(2-Ethylhexyl) Phthalate-degrading enrichment culture. *Microbiol. Resour. Announc.* 9(45): e01087-20.
- Harrington, D. A. L., J. L. Stevens, M. J. Johnson, S. J. Pochiro, M. M. Moriarty, et al. 2020. Genome sequences of *Gordonia rubripertincta* bacteriophages Jellybones and NHagos. *Microbiol. Resour. Announc.* 9(40): e00935-20.
- Kang, Y., L. Yuan, X. Shi, Y. Chu, Z. He, et al. 2021. A fine-scale map of genome-wide recombination in divergent *Escherichia coli* population. *Brief. Bioinform.* 22(4): bbaa335.
- Lozano-Andrade, C. N., M. L. Strube, Á. T. Kovács. 2021. Complete genome sequences of four soil-derived isolates for studying synthetic bacterial community assembly. *Microbiol. Resour. Announc.* 10(46): e00848-21.
- Luo, Q., S. Hiesl, A. Poehlein, R. Daniel, A. Steinbüchel. 2014. Insights into the microbial degradation of rubber and gutta-percha by analysis of the complete genome of *Nocardia nova* SH22a. *Appl. Environ. Microbiol.* 80(13): 3895–3907.
- Pope, W. H., C. A. Bowman, D. A. Russell, D. Jacobs-Sera, D. J. Asai, et al. 2015. Whole genome comparison of a large collection of mycobacteriophages reveals a continuum of phage genetic diversity. *Elife.* 4: e06416.
- Pope, W. H., K. A. Butela, R. A. Garlena, D. Jacobs-Sera, D. A. Russell, et al. 2020. Genome sequences of 20 bacteriophages isolated on *Gordonia terrae*. *Microbiol. Resour. Announc.* 9(3): e01489-19.
- Sichtig, H., T. Minogue, Y. Yan, C. Stefan, A. Hall, et al. 2019 FDA-ARGOS is a database with public quality-controlled reference genomes for diagnostic use and regulatory science. *Nat. Commun.* 10(1), 1–13.
- Versoza, C.J., A.A. Howell, T. Aftab, M. Blanco, A. Brar, E. Chaffee, N. Howell, W. Leach, J. Lobatos, M. Luca, et al. The complete genome sequence of the *Gordonia* bacteriophage BiggityBass. Accepted, *Microbiol. Resour. Announc.*
